# Supplementary figures and images for: Comprehensive assessment of estrogen receptor beta antibodies in cancer cell line models and tissue reveals critical limitations in reagent specificity
Source: PubMed Central journal article supplement — Mol Cell Endocrinol. 2017 Jan 15;440:138–50. doi: 10.1016/j.mce.2016.11.016 (PMC5228587; doi:10.1016/j.mce.2016.11.016), 2017-01-15

Supplementary Figure 1

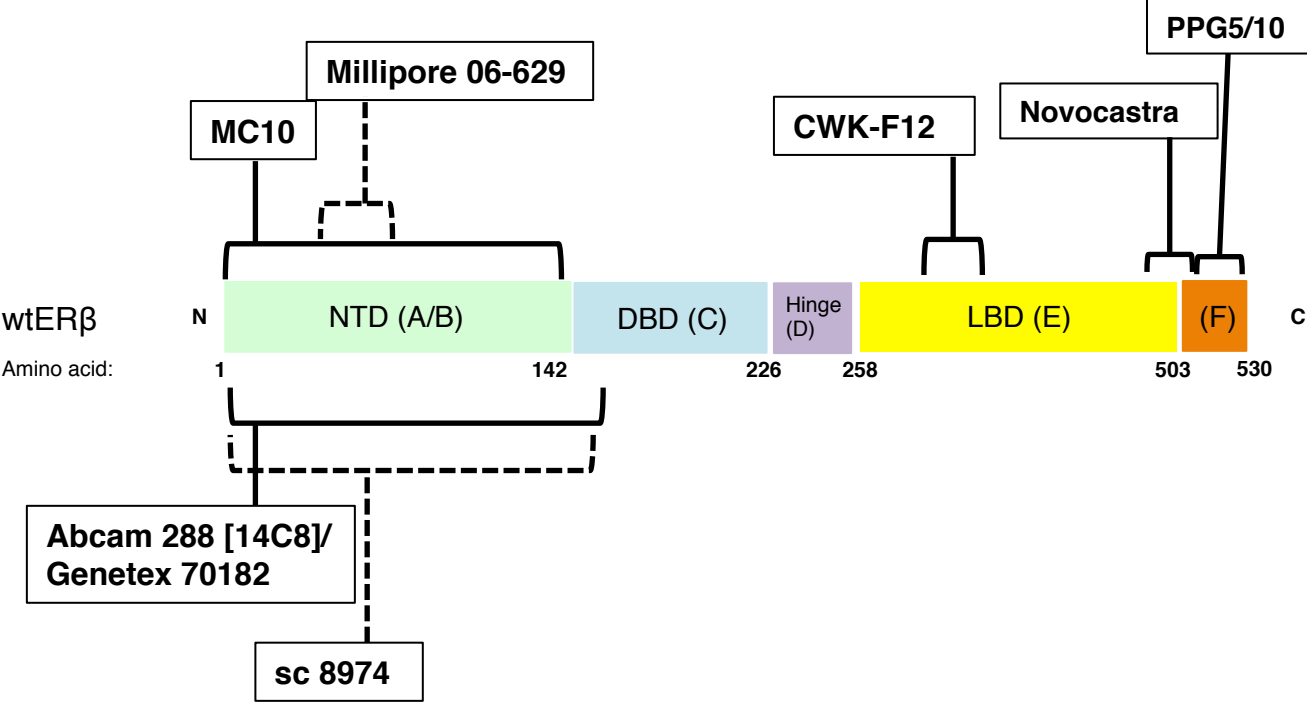

Supplement: mmc1.pdf [file mmc1.pdf]
